# Supplementary material for: The cyclin-dependent kinase inhibitor p21 is regulated by RNA-binding protein PCBP4 via mRNA stability
Source: PubMed Central journal article supplement — Nucleic Acids Res. 2010 Sep 3;39(1):213–24. doi: 10.1093/nar/gkq778 (PMC3017617; doi:10.1093/nar/gkq778), 2010-09-03
Supplement: supp_gkq778_SASFiG123.pdf [file supp_gkq778_SASFiG123.pdf]

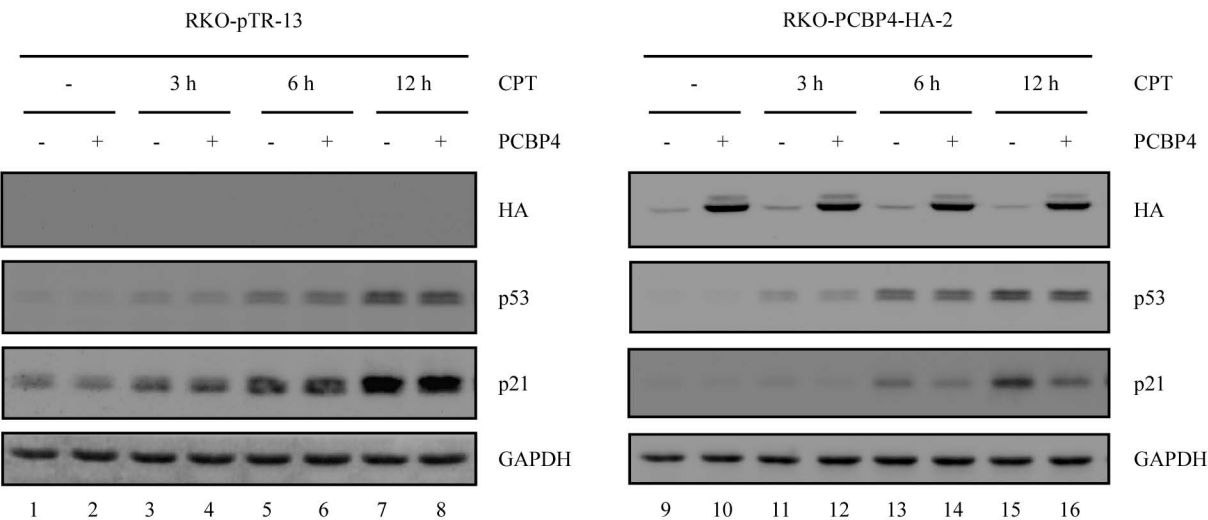

**Figure S1. PCBP4 prevents the induction of p21 by DNA damage in RKO cells.** Cell extracts were prepared from RKO-pTR-13 (left panel) and RKO-PCBP4-HA-2 (right panel) cells uninduced (-) or induced (+) to express PCBP4 for 2 days, and then untreated or treated with 200 nM CPT for 3, 6 or 12 h. Levels of HA-tagged PCBP4, p53, p21 and GAPDH were detected by Western blot analysis.

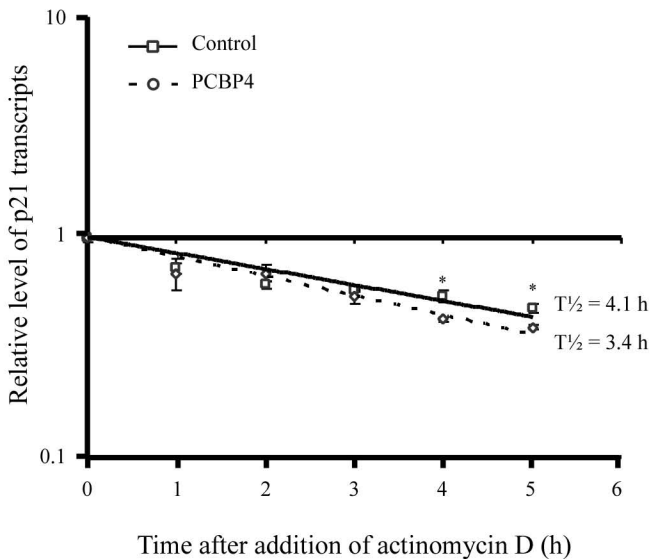

**Figure S2. PCBP4 expression decreases p21 mRNA half-life in MCF7 cells.** Levels of p21 and GAPDH transcripts were measured by quantitative RT-PCR on cDNA samples from MCF7 cells that were uninduced or induced to express PCBP4 for 2 days, and then treated with 2  $\mu$ g/ml actinomycin D for 0, 1, 2, 3, 4 or 5 h. Upon normalization to GAPDH transcript levels, the mean  $\pm$  S.D. from triplicate samples was plotted and the relative half-life of p21 transcript was calculated. \*,  $p < 0.05$ .

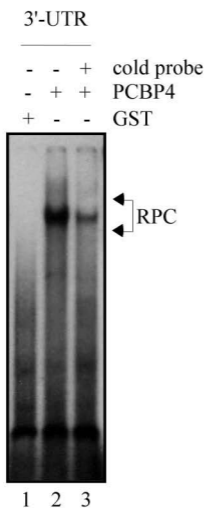

**Figure S3. PCBP4 binds specifically to the 3'-UTR of p21.** Competition REMSA assay was performed by adding an excess amount of unlabeled full-length p21 3'-UTR probe to compete the binding of PCBP4 to radiolabeled p21 probe.
